# Supplementary material for: Flattened trigonal bipyramidal coordination assembly with trans geometry
Source: Royal Society of Chemistry journal article supplement (doi:10.1039/b716733b), 2007-11-16
Supplement: b716733b.pdf [file b716733b.pdf]

Supplementary Information

## “Flattened trigonal bipyramidal coordination assembly with *trans* geometry”

Aleema Westcott, Julie Fisher, Lindsay P. Harding and Michaele J. Hardie

### General Experimental

Ligand N,N',N''-tris(6-methyl-2-pyridyl)benzene-1,3,5-tricarboxamide was synthesised by literature methods.<sup>1</sup> Other chemicals were obtained from commercial sources and used without further purification. Infra-red spectra were recorded as solid phase samples on a Perkin-Elmer Spectrometer. Microanalyses were performed by the University of Leeds microanalytical service.

### NMR studies

DOSY NMR measurements were made on a Varian Inova 500 MHz spectrometer operating under regulated temperature conditions (20°C), with a 5 mm probe. The pulse sequence employed was a bipolar pulse pair simulated echo (BPPSTE) operating in the ONESHOT experiment. Additional parameters: number of different gradient levels, 15; gradient stabilisation delay, 0.002 s; gradient length, 0.002 s; diffusion delay, 0.03 s; relaxation delay, 5 s; Kappa (unbalancing factor), 0.2. An exponential function with 1 Hz line broadening was applied prior to Fourier transformation. The resulting array was phased and baseline corrected using a macro provided by Prof. Gareth Morris (Department of Chemistry, University of Manchester, UK). Standard <sup>1</sup>H NMR spectra recorded on the same instrument were generally acquired with spectral width of 8500 Hz, in 16,384 complex data points and a relaxation delay of 3 s. Nuclear Overhauser spectra were recorded on a Bruker DRX 500 using the noemul sequence. Sample temperature was maintained at -20 °C throughout; this was to slow down the conversion from asymmetric to symmetric entity (this was before it was discovered that conversion occurred over a period of days at room temperature). Typically a spectral width of 7500 Hz was used in 8192 data points. The total nOe build-up time of 6 s was employed.

Sections of the standard NMR spectra of the ligand L1 and a CDCl<sub>3</sub> solution of L1 and Pd(O<sub>2</sub>CCH<sub>3</sub>)<sub>2</sub> are shown in Figure S1.

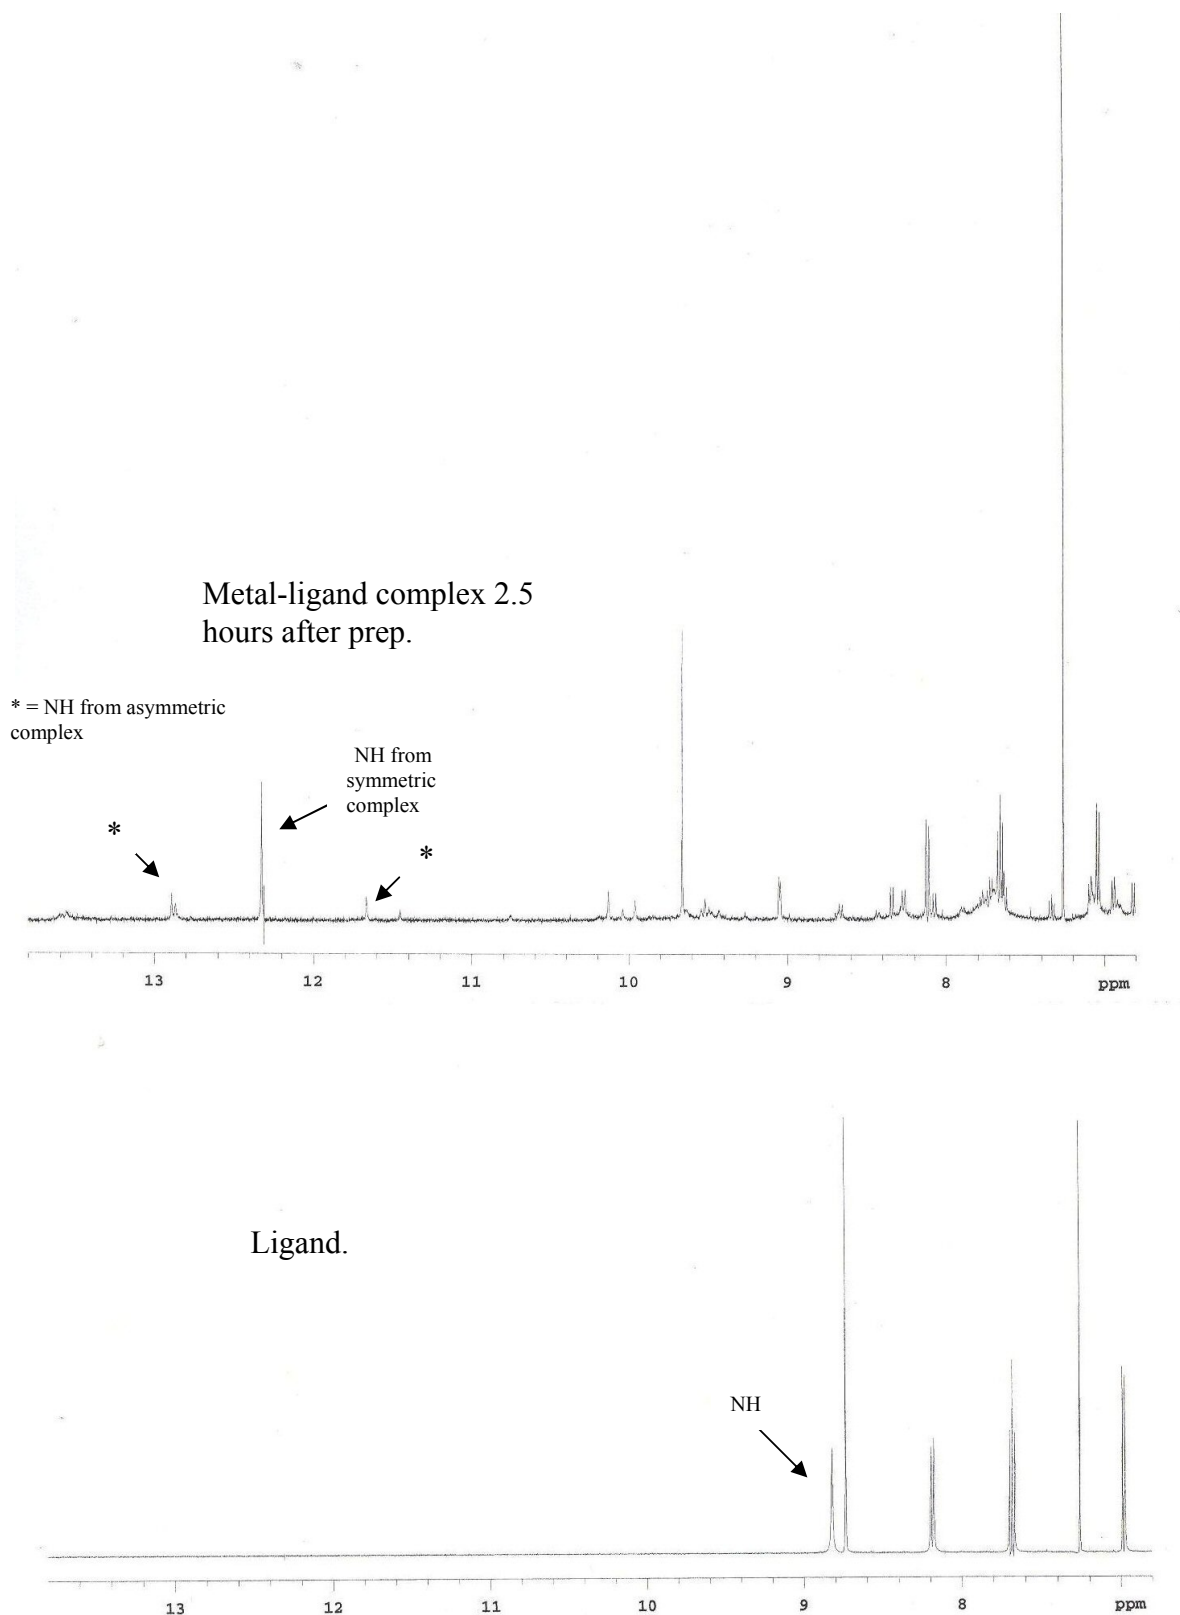

Figure S1: Section of the  $\text{CDCl}_3$   $^1\text{H}$  NMR spectra of a 2:3 mixture of ligand L1 and  $\text{Pd}(\text{O}_2\text{CCH}_3)_2$  2.5hrs after mixing (top), and ligand L1 (bottom).

*DOSY calibration*

Spectra were acquired in a similar manner to that described above, with diffusion delay and gradient length optimised for each sample. Solution concentrations were all 5 mM.

| Name                                                                | Molecular weight | Diffusion coefficient ( $\times 10^{10}$ ) $\text{m}^2\text{s}^{-1}$ |
|---------------------------------------------------------------------|------------------|----------------------------------------------------------------------|
| Hexakis(2-pyridylmethyl)cyclotrimeratrylene                         | 913.11           | 8.703                                                                |
| Tris(4-[2-pyridyl]benzyloxy)cyclotriguaiacylene                     | 910.14           | 9.037                                                                |
| Tris(4-[2,2',6',2''-terpyridyl]benzyl)cyclotriguaiacylene           | 323.4            | 10.197                                                               |
| Benzene-1, 3, 5-tricarboxylic acid tris(6-methyl-2-pyridinyl) amide | 480.0            | 11.503                                                               |
| Dipyridyl                                                           | 184.24           | 13.573                                                               |
| 4-aminopyrimidine                                                   | 95.11            | 17.821                                                               |

**Diffusion coefficients ( $\times 10^{10}$ ) $\text{m}^2\text{s}^{-1}$  of;**

Ligand L1 – 11.5

Asymmetric species – 7.0

Symmetric species – 7.5

### Mass spectrometry studies

Electrospray (ES) mass spectra were measured on a Bruker MicroTOF-Q instrument in positive ion mode. The spectra obtained for  $\text{CHCl}_3$  solutions of ligand L1 and  $\text{Pd}(\text{O}_2\text{CCH}_3)_2$  in 2:3 and 1:5 proportions are shown in Figures S2 and S3 respectively.

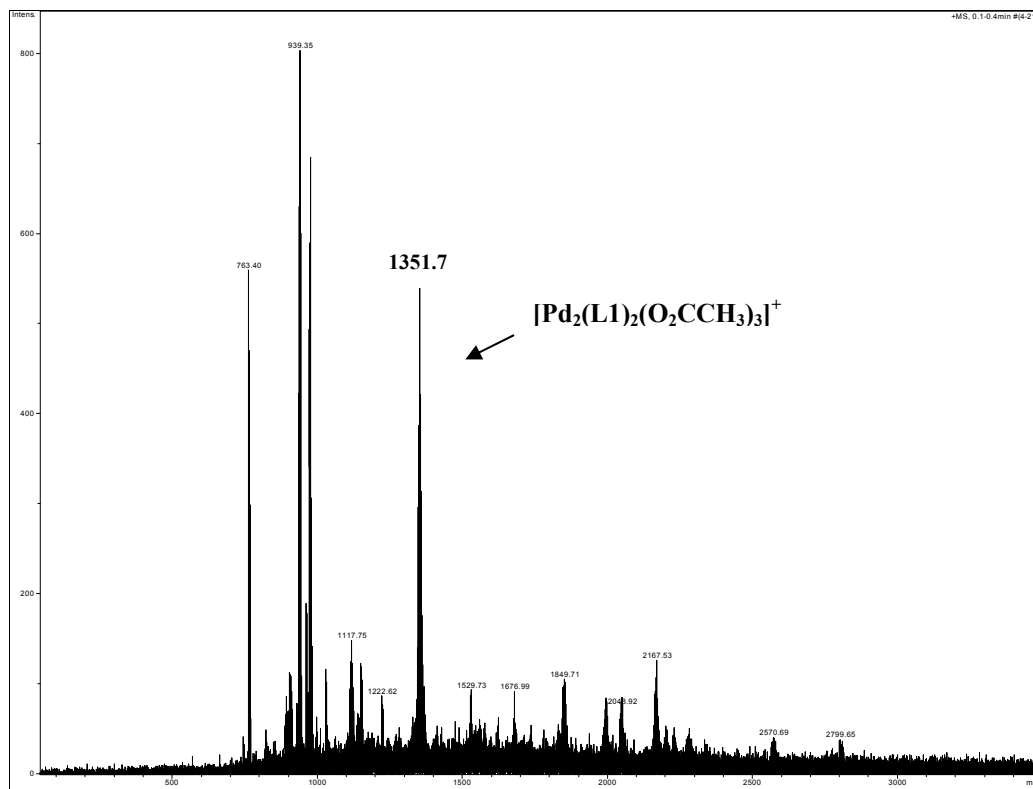

Figure S2: Mass spectrum of a  $\text{CHCl}_3$  solution of ligand L1 and  $\text{Pd}(\text{O}_2\text{CCH}_3)_2$  in 2:3 proportions.

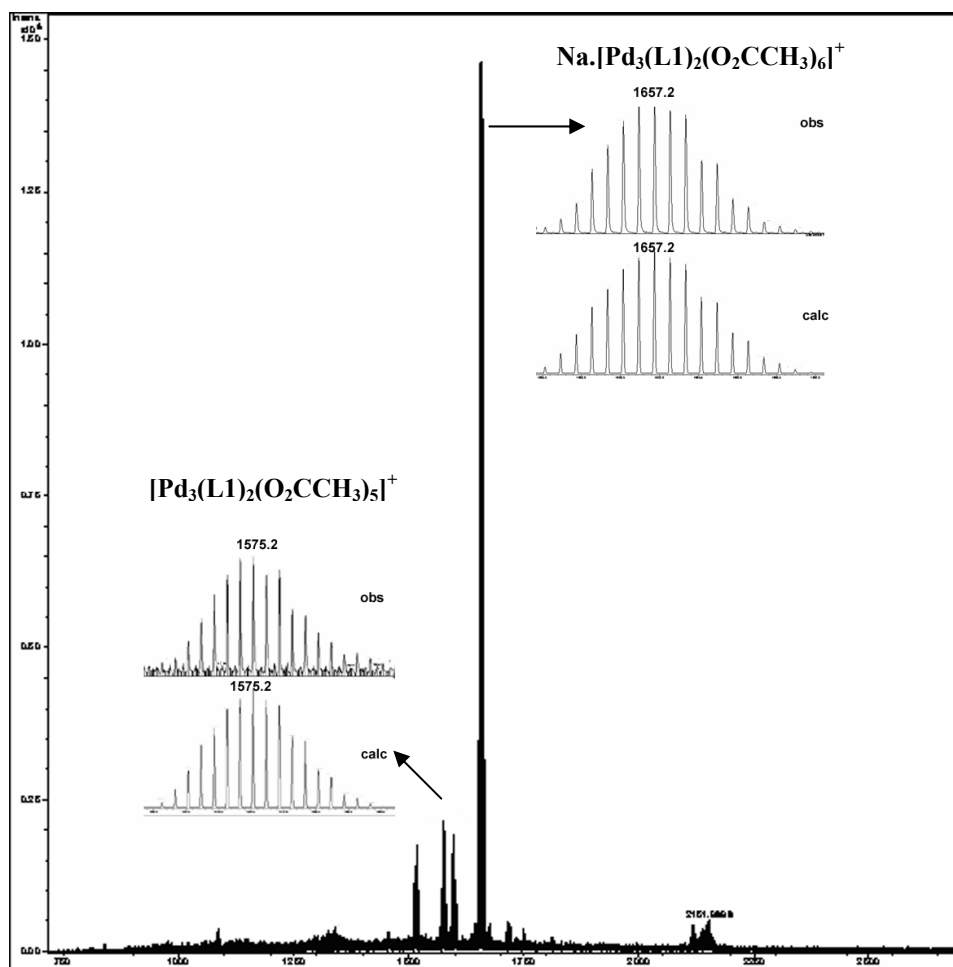

Figure S3: Mass spectrum of a  $\text{CHCl}_3$  solution of ligand L1 and  $\text{Pd}(\text{O}_2\text{CCH}_3)_2$  in 1:5 proportions.

**Synthesis of single crystals of  $[\text{Pd}_3(\text{N},\text{N}',\text{N}'\text{-tris}(6\text{-methyl-2-pyridyl)benzene-1,3,5\text{-tricarboxamide})_2(\text{O}_2\text{CCH}_3)_6]$  1** A solution of benzene-1,3,5-tricarboxylic acid tris-[(6-methylpyridin-2-yl)-amide] (10 mg, 21  $\mu\text{mol}$ ) in trifluoroethanol (6 mL) was added to a solution of  $\text{Pd}(\text{OAc})_2$  (4.7 mg, 21  $\mu\text{mol}$ ) in methanol (1 mL) in a glass vial giving a pale yellow suspension. The solution was allowed to evaporate slowly through pin holes in the cap of the vial, and gave crystals suitable for X-ray structure determination after eight months. Yield: 8.26 mg, 24 %; CHN Anal. With sample dried under vacuum prior to analysis: (Found: C, 46.75; H, 3.80; N, 10.05. Calc. for  $\text{Pd}_3\text{C}_{54}\text{H}_{48}\text{O}_6\text{N}_{12}\cdot 2.5\text{H}_2\text{O}(\text{O}_2\text{CCH}_3)_6$ : C, 47.19; H, 4.27; N, 10.01 %); IR (solid state):  $\nu_{\text{max}} = 622, 695, 792, 949, 1049, 1109, 1152, 1175, 1238, 1258, 1305, 1393, 1471, 1526, 1592, 1694, 1899, 2001, 2022, 2136, 2148, 2331, 2353, 3324 \text{ cm}^{-1}$ .

#### Crystallographic procedures:

Crystals were mounted under oil or grease onto a glass fibre and X-ray data collected at low temperature on a Bruker X8 Apex II diffractometer with Mo- $K\alpha$  radiation ( $\lambda = 0.71073 \text{ \AA}$ ). A crystal of **1** was mounted directly from the mother liquor, whereas **1a** were dried under vacuum at 100 °C for 24 hours before being cooled and exposed to the atmosphere prior to mounting. Data were corrected for Lorentz and polarisation effects, and absorption corrections applied using a multi-scan method (SADABS). Structures were solved by direct methods using SHELXS-97<sup>2</sup> and refined by full-matrix least squares on  $F^2$  by SHELXL-97<sup>3</sup> via the X-Seed GUI.<sup>4</sup> All non-hydrogen atoms were refined anisotropically and hydrogen atoms were included as invariants at geometrically estimated positions. The asymmetric unit for both structure determinations and molecular species for **1a** are shown in Figure S4.

**Crystal data for complex 1a:**  $C_{66}H_{66}N_{12}O_{18}Pd_3$ ,  $M_r = 1634.51$ , trigonal,  $a = 22.6400(11)$ ,  $c = 19.219(3) \text{ \AA}$ ,  $V = 8531.2(15) \text{ \AA}^3$ , space group  $P-31c$ ,  $Z = 4$ ,  $\rho_{calc} = 1.273 \text{ g.cm}^{-3}$ ,  $\mu = 0.689 \text{ mm}^{-1}$ ,  $\theta_{max} = 23.25^\circ$ , 62587 data collected, 4080 unique,  $R_{int} = 0.1100$ , 302 parameters,  $R_1 = 0.1046$  (for 2224 data  $I > 2\sigma(I)$ ),  $wR_2 = 0.3427$  (all data),  $S = 1.142$ , max. residual e-density =  $1.192 \text{ e \AA}^{-3}$ .

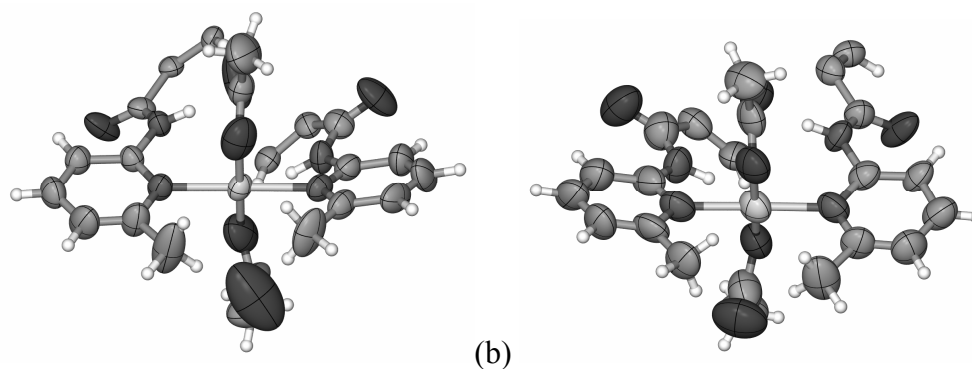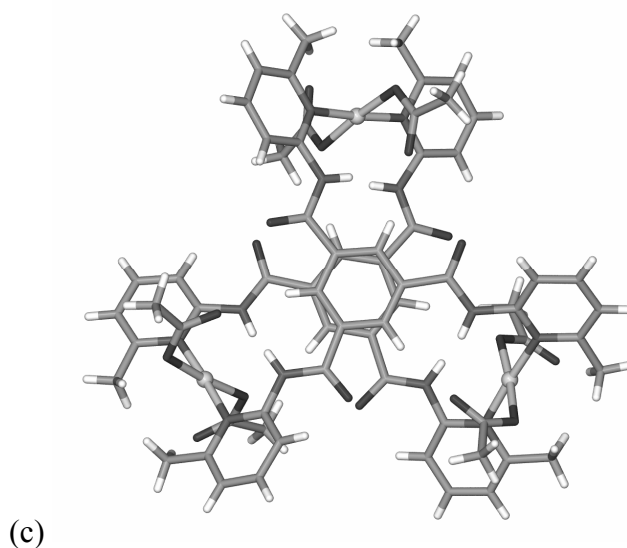

*Figure S4. Asymmetric units of the crystal structures of (a) complex 1; (b) complex 1a. Ellipsoids are shown at 50% probability levels. (c) [Pd<sub>3</sub>(L1)<sub>2</sub>(OAc)<sub>6</sub>] complex 1a.*

- [1] B. Koenig, O. Moeller, P. Bubenitschek and P. G. Jones, *J. Org. Chem.*, 1995, **60**, 4291
- [2] G. M. Sheldrick, SHELXS-97, University of Göttingen, Germany, **1990**.
- [3] G. M. Sheldrick, SHELXL-97, University of Göttingen, Germany, **1997**.
- [4] L. J. Barbour, *J. Supramol. Chem.* **2001**, *1*, 189.
- [5] A. Spek, P. van der Sluis, *Acta Crystallogr., Sect. A: Found. Crystallogr.* **1990**, *46*, 194.
